# Supplementary material
Source: PubMed Central journal article supplement (PMC5158309)
Supplement: NIHMS829882-supplement-Figure_3.pdf [file NIHMS829882-supplement-Figure_3.pdf]

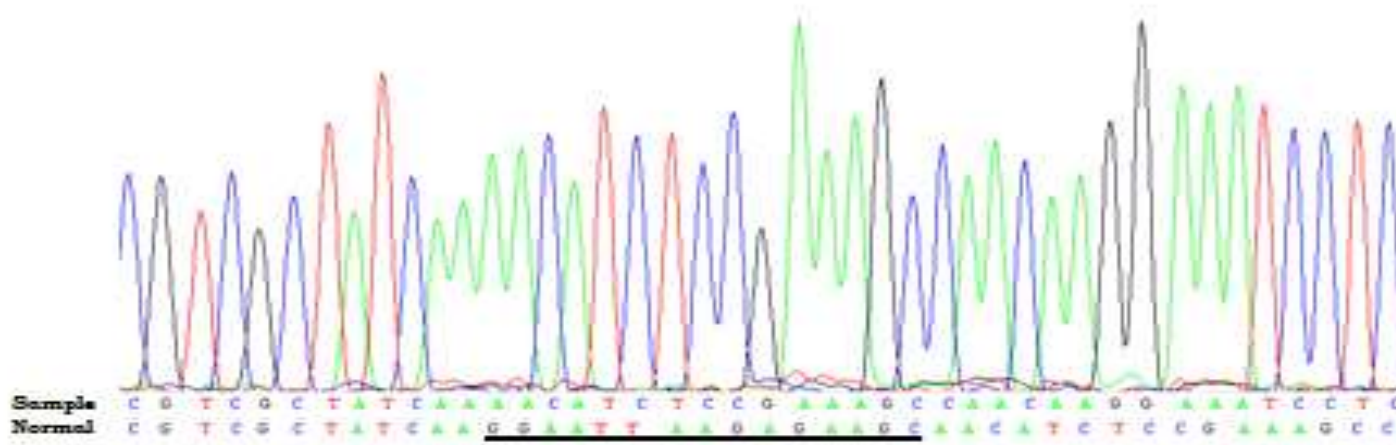

Figure. Colored peaks correspond to the exon 19 DNA sequence indicated as sample. The reference normal sequence is below. The 15 nucleotides deleted in the sample are underlined in the normal. The deletion appears homozygous.
